# Supplementary figures and images for: An ab initio study of size-selected Pd nanocluster catalysts for the hydrogenation of 1-pentyne
Source: Royal Society of Chemistry journal article supplement (doi:10.1039/d1cp05470h), 2022-01-01

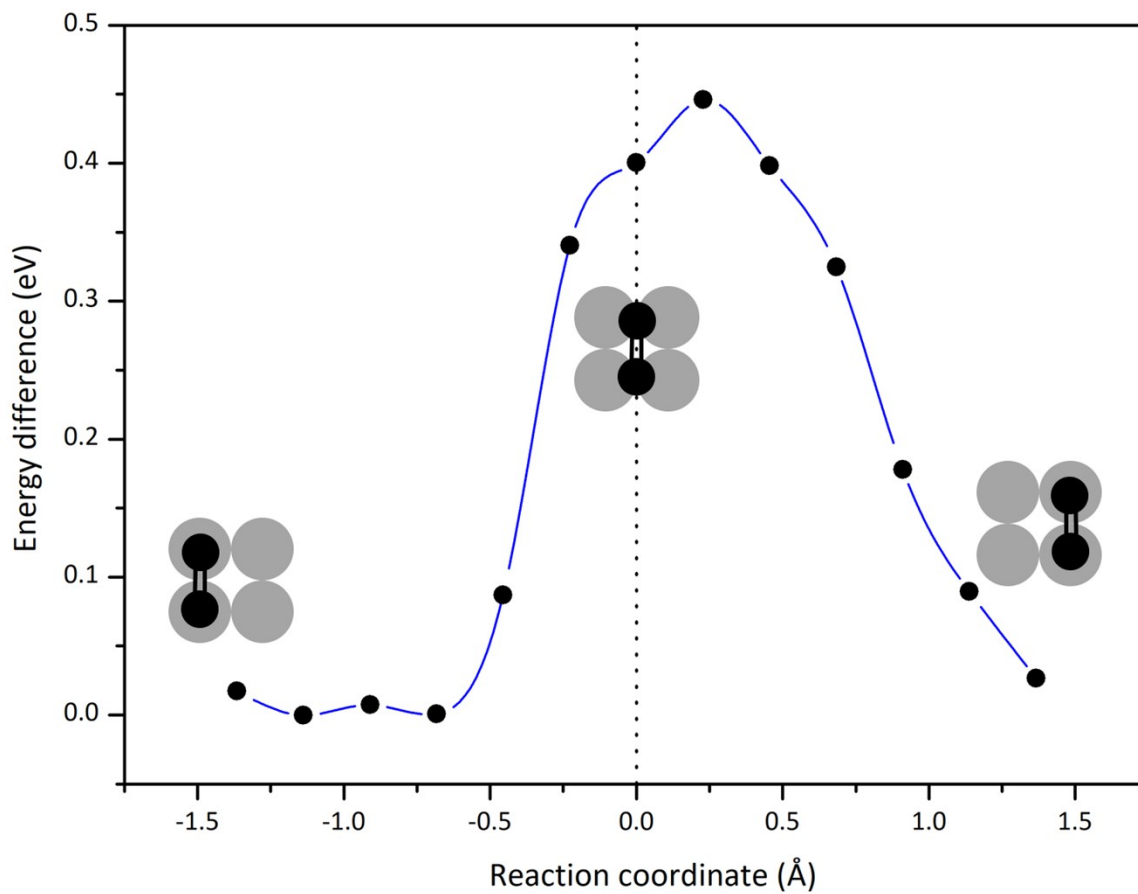

**Figure S1:** Energy barrier for the migration of the 1-pentene molecule on a (100) facet of a Pd<sub>561</sub> NP.

Supplement: d1cp05470h1.pdf [file d1cp05470h1.pdf]
